# Supplementary material for: An Electrochemical Aptasensor Using Coaxial Capillary with Magnetic Nanoparticle, Urease Catalysis and PCB Electrode for Rapid and Sensitive Detection of Escherichia coli O157:H7
Source: PubMed Central journal article supplement — Nanotheranostics. 2017 Oct 9;1(4):403–14. doi: 10.7150/ntno.22079 (PMC5647763; doi:10.7150/ntno.22079), 2017-10-09
Supplement: ntnov01p0403s1.pdf [file ntnov01p0403s1.pdf]

**An electrochemical aptasensor using coaxial capillary with magnetic nanoparticle, urease catalysis and PCB electrode for rapid and sensitive detection of *Escherichia coli* O157:H7**

Lei Wang<sup>1</sup>, Fengchun Huang<sup>1</sup>, Gaozhe Cai<sup>2</sup>, Lan Yao<sup>2</sup>, Huilin Zhang<sup>1</sup>,  
Jianhan Lin<sup>2\*</sup>

<sup>1</sup>Key Laboratory of Agricultural Information Acquisition Technology, Ministry of Agriculture, China Agricultural University, 17 East Qinghua Road, Beijing, 100083 China

<sup>2</sup>Key Laboratory on Modern Precision Agriculture System Integration Research, Ministry of Education, China Agricultural University, 17 East Qinghua Road, Beijing, 100083 China

\*Corresponding author: Dr. Jianhan Lin, Phone/Fax: +86-10-62737599;  
Email: [jianhan@cau.edu.cn](mailto:jianhan@cau.edu.cn)

## Table of Contents

|                     |           |
|---------------------|-----------|
| <b>Fig. S1.....</b> | <b>S3</b> |
| <b>Fig. S2.....</b> | <b>S4</b> |

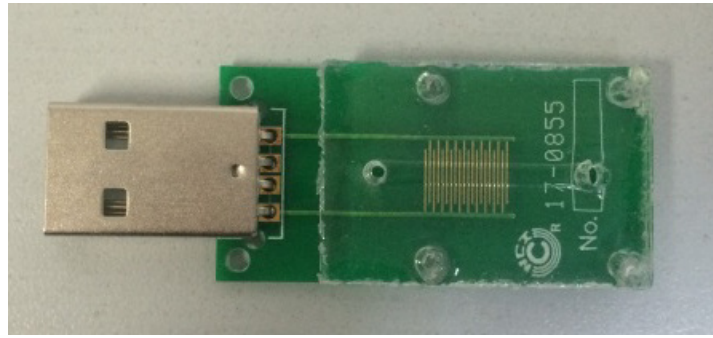

Fig. S1. The gold plating PCB electrode.

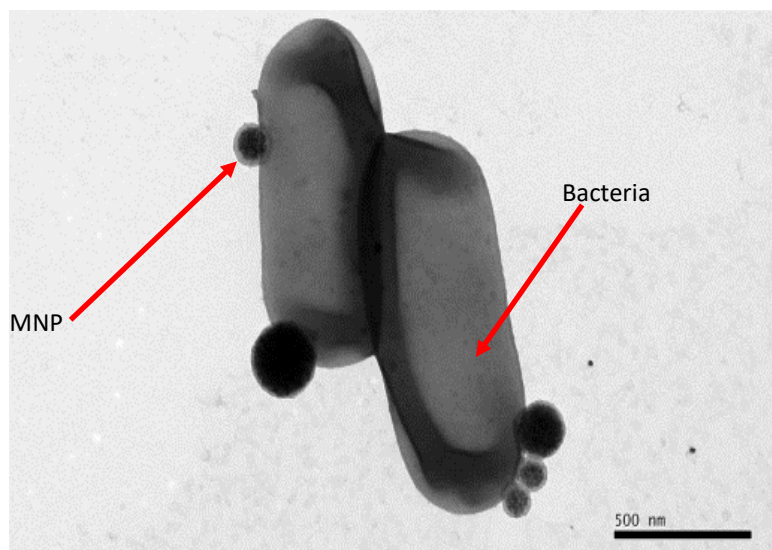

(a)

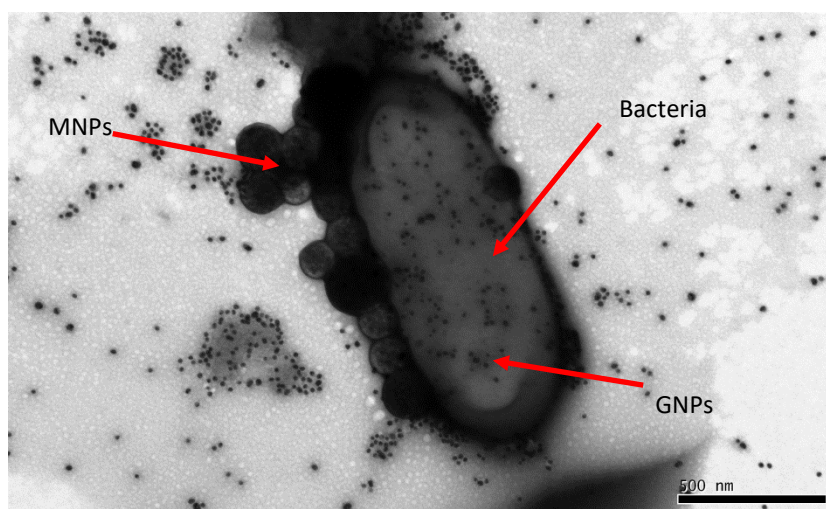

(b)

Fig. S2. The pictures of the MNP-PAb-bacteria complex (a) and the MNP-PAb-bacteria-aptamer-GNP-urease complex (b).
